# Activation of NAD(P)H:quinone oxidoreductase ameliorates spontaneous hypertension in an animal model via modulation of eNOS activity

Yong-Hoon Kim<sup>1</sup>, Jung Hwan Hwang<sup>1</sup>, Jung-Ran Noh<sup>1</sup>, Gil-Tae Gang<sup>1</sup>, Do Hyung Kim<sup>2</sup>, Hwa-Young Son<sup>3</sup>, Tae Hwan Kwak<sup>4</sup>, Minho Shong<sup>5</sup>, In-Kyu Lee<sup>2</sup>, and Chul-Ho Lee<sup>1\*</sup>

<sup>1</sup>Animal Model Center, Korea Research Institute of Bioscience and Biotechnology, 111 Gwahangno, Yuseong-gu, Daejeon 305-806, Republic of Korea; <sup>2</sup>Department of Internal Medicine, WCU project 'Development for new drug-target in complication of metabolic syndrome', Research Institute for Aging and Metabolism, Kyungpook National University School of Medicine, Daegu, South Korea; <sup>3</sup>College of Veterinary Medicine, Chungnam National University, Daejeon, South Korea; <sup>4</sup>Mazence Inc R&D Center, Suwon, South Korea; and <sup>5</sup>Department of Internal Medicine, Chungnam University School of Medicine, Daejeon, South Korea

Received 28 November 2010; revised 15 March 2011; accepted 7 April 2011; online publish-ahead-of-print 18 April 2011

Time for primary review: 36 days

## Aims

Hypertension is one of the most common human diseases worldwide, and extensive research efforts are focused upon the identification and utilizing of novel therapeutic drug targets. Nitric oxide (NO) produced by endothelial NO synthase (eNOS) is an important regulator of blood pressure (BP).  $\beta$ -Lapachone ( $\beta$ L), a well-known substrate of NAD(P)H:quinone oxidoreductase (NQO1), increases the cellular NAD<sup>+</sup>/NADH ratio via the activation of NQO1. In this study, we evaluated whether  $\beta$ L-induced activation of NQO1 modulates BP in an animal model of hypertension.

## Methods and results

Spontaneously hypertensive rats (SHR), primary human aortic endothelial cells (HAEC), and endothelial cell lines were used to investigate the hypotensive effect of  $\beta$ L and its mode of action.  $\beta$ L treatment stimulated endothelium-dependent vascular relaxation in response to acetylcholine in aorta of SHR and dramatically lowered BP in SHR, but the hypotensive effect was completely blocked by eNOS inhibition with  $\omega$ -nitro-L-arginine methyl ester. Aortic eNOS phosphorylation and eNOS protein expression were significantly increased in  $\beta$ L-treated SHR. *In vitro* studies revealed that  $\beta$ L treatment elevated the intracellular NAD<sup>+</sup>/NADH ratio and concentration of free Ca<sup>2+</sup> ([Ca<sup>2+</sup>]<sub>i</sub>), and resulted in Akt/AMP-activated protein kinase/eNOS activation. These effects were abolished by NQO1 siRNA and [Ca<sup>2+</sup>]<sub>i</sub> inhibition through a ryanodine receptor blockade.

## Conclusion

This study is the first to demonstrate that NQO1 activation has a hypotensive effect mediated by eNOS activation via cellular NAD<sup>+</sup>/NADH ratio modulation in an animal model. These results provide strong evidence suggesting NQO1 might be a new therapeutic target for hypertension.

## Keywords

eNOS • Hypertension • NAD<sup>+</sup>/NADH ratio • NQO1 •  $\beta$ -Lapachone

## 1. Introduction

Uncontrolled hypertension is a key risk factor for cerebrovascular accidents, myocardial infarction, cardiac failure, arterial aneurysm, and chronic renal failure.<sup>1</sup> Although many anti-hypertensive medications have been developed and extensive research efforts focus on the exploitation of novel therapeutic drug targets, the percentage of hypertensive patients with blood pressures (BPs) in the control range (usually <140/90 mmHg) remains low.<sup>1–4</sup>

Nitric oxide (NO), an endothelium-derived relaxing factor,<sup>5</sup> is an important regulator of vascular tone and BP and is synthesized by endothelial NO synthase (eNOS).<sup>6</sup> Blocking eNOS with pharmacological inhibitors causes significant peripheral vasoconstriction and elevation of BP.<sup>7</sup> The major determinants of NO synthesis by eNOS include phosphorylation and intracellular concentration of free Ca<sup>2+</sup> ([Ca<sup>2+</sup>]<sub>i</sub>).<sup>8–10</sup> In endothelial cells, phosphorylation of the eNOS carboxy-terminus at serine<sup>1177</sup> (Ser<sup>1177</sup>) is crucial to eNOS activation.<sup>11,12</sup> Protein kinase B/Akt is the major kinase for eNOS phosphorylation at Ser<sup>1177</sup>,<sup>11</sup> and

\* Corresponding author. Tel: +82 42 860 4637; fax: +82 42 860 4609, Email: chullee@kribb.re.kr

AMP-activated protein kinase (AMPK) also plays an important role in regulating eNOS protein expression.<sup>13</sup> In endothelial cells, store-operated  $\text{Ca}^{2+}$  entry regulates many endothelial functions.<sup>14</sup> eNOS, a  $\text{Ca}^{2+}$ /calmodulin-dependent enzyme, is activated by an increase in  $[\text{Ca}^{2+}]_i$ .<sup>15</sup> Moreover, this  $[\text{Ca}^{2+}]_i$  has been known to be modulated by ryanodine receptors (RyRs) and the endoplasmic reticulum  $\text{Ca}^{2+}$  channels. RyRs activity is regulated by cyclic ADP-ribose (cADPR), a metabolite of  $\text{NAD}^+$ .<sup>16</sup> Previously, it was reported that treatment with an intracellular  $\text{Ca}^{2+}$  chelator inhibited eNOS-Ser<sup>1177</sup> phosphorylation,<sup>17</sup> while stimulation of  $\text{Ca}^{2+}$  flux by an ionophore increased Ser<sup>1177</sup> phosphorylation.<sup>18</sup>

NAD(P)H:quinone oxidoreductase (NQO1), a homodimeric enzyme initially identified in 1958, catalyses the oxidation of NADH to  $\text{NAD}^+$  by various quinines,<sup>19</sup> and significantly reduced  $\text{NAD}^+$ /NADH ratios were observed in the liver and kidneys of NQO1<sup>-/-</sup> mice.<sup>20</sup> Several activators and substrates of NQO1 have been identified. One well-known NQO1 substrate is  $\beta$ -lapachone ( $\beta$ L; 3,4-dihydro-2,2-dimethyl-2H-naphtho[1,2-b]pyran-5,6-dione).<sup>21,22</sup>  $\beta$ L extract, isolated from the bark of the Lapacho tree, has been used as a folk medicine for centuries<sup>23</sup> and initial studies have demonstrated its ability to inhibit tumour growth.<sup>24</sup>

Recent studies have indicated that  $\beta$ L increases the  $\text{NAD}^+$ /NADH ratio via NQO1 activation. Moreover, an increased cytoplasmic  $\text{NAD}^+$ /NADH ratio has beneficial effects on several features of metabolic syndrome, including obesity amelioration in mice and prevention of arterial smooth muscle cell proliferation in rats.<sup>25,26</sup> In this study, we observed that the increased  $\text{NAD}^+$ /NADH ratio resulting from NQO1 activation lowered BP via aortic endothelial eNOS modulation in spontaneously hypertensive rats (SHR). Here, we have introduced the experimental results and the underlying mechanism.

## 2. Methods

### 2.1 Materials

$\beta$ L was chemically synthesized by Mazence Co (Suwon, Korea).  $\omega$ -Nitro-L-arginine methyl ester (L-NAME), acetylcholine, phenylephrine, 1,2-Bis(2-aminophenoxy)ethane-N,N,N',N'-tetraacetic acid tetrakis (BABTA-AM), ethylene glycol tetraacetic acid (EGTA), 8-Br-cADPR, ES936, nicotinamide, LY249002, Wortmannin, compound C and 5-aminoimidazole-4-carboxamide-1- $\beta$ -D-ribofuranoside (AICAR) were purchased from Sigma Chemical Co (St Louis, MO, USA). Dicoumarol was purchased from Calbiochem (San Diego, CA, USA). Anti-eNOS antibody was purchased from BD Biosciences (San Diego, CA, USA). Anti-phospho-eNOS-Ser<sup>1177</sup>, Anti-phospho-eNOS-Thr<sup>495</sup>, anti-phospho-Akt-Ser<sup>473</sup>, anti-phospho-Akt, anti-phospho-AMPK-Thr<sup>172</sup>, anti-AMPK, anti-phospho-ACC-Ser<sup>79</sup>, and anti-ACC antibodies were purchased from Cell Signaling Technology (Beverly, MA, USA). Anti-NQO1 antibody was purchased from Santa Cruz Biotechnology (Santa Cruz, CA, USA).

### 2.2 Animals and experimental procedures

Twelve-week-old male SHR were purchased from an established colony at the Japan SLC (Inasa Production Facility, Japan). Experimental animals were assigned to three groups: (i) Group 1 included two subgroups that received either a regular chow diet or a diet containing  $\beta$ L (Mazence Co., Korea; 0.12%, wt/wt) for 3 days; (ii) Group 2 included two subgroups that received either a regular chow diet or a diet containing  $\beta$ L for 4 weeks; and (iii) Group 3 comprised three subgroups, a control group that received a regular chow diet for 6 weeks, a  $\beta$ L group that received  $\beta$ L in the diet for 6 weeks, and a  $\beta$ L + L-NAME group that received the same diet with  $\beta$ L group for the first 3 weeks

followed by the addition of eNOS inhibitor L-NAME to drinking water for 7 days during Week 4 and 6 (50 mg/kg/day). All rats were acclimatized to a 12 h light/dark cycle at  $22 \pm 2^\circ\text{C}$  for 2 weeks with unlimited food (standard chow diet; Research Diets Inc., New Brunswick, NJ, USA) and water in a pathogen-free facility. All animal experiments were approved by the Institutional Animal Use and Care Committee of the Korea Research Institute of Bioscience and Biotechnology (KRIBB) and were performed in accordance with the Guide for the Care and Use of Laboratory Animals published by the US National Institutes of Health (NIH Publication No. 85-23, revised 1996).

### 2.3 Cell culture

Primary human aortic endothelial cells (HAEC) and mouse brain endothelial (bEnd.3) cells were purchased from ATCC. HAEC were cultured in endothelial basal medium-2 (EBM-2) medium supplemented with EGM-2 bullet kits (Endothelial Growth Medium-2; Lonza, Basel, Switzerland). bEnd.3 cells were maintained in DMEM (Dulbecco's modified Eagle's medium; Hyclone Laboratory, UT, USA) supplemented with 10% foetal bovine serum, 0.5% bovine serum albumin, 250  $\mu\text{mol/L}$  dimethyl sulfoxide, 100 U/mL penicillin, and 100  $\mu\text{g/mL}$  streptomycin in a humidified atmosphere (5%  $\text{CO}_2$ /95% air) at  $37^\circ\text{C}$ .

### 2.4 Measurement of BP

Systolic BP (SBP) and diastolic BP (DBP) were measured in all animals each week following treatment. The rats were preheated to dilate their tail vessels first for 15–20 min at  $39^\circ\text{C}$  in a warming box and then BP was measured using the non-invasive tail cuff method in a restrainer heated electrically to  $39^\circ\text{C}$ . The animals were pre-trained with the apparatus (Softron BP-98A, Tokyo, Japan) at least three times before measurements, and BP was determined.

### 2.5 Measurement of cellular total $\text{NAD}^+$ /NADH ratio

Cells were harvested with 80% methanol and lysed mechanically using a 31-gauge needle. Electrospray ionization mass spectrometry was performed in positive ion mode as described previously (see Supplementary materials online, *Methods*).<sup>27</sup>

### 2.6 Determination of pyruvate/lactate ratio

The pyruvate/lactate ratio representing the cytosolic free  $\text{NAD}^+$ /NADH ratio<sup>28</sup> was measured with a D-lactate assay kit (Megazyme International, Bray, Ireland) according to the manufacturer's instructions (see Supplementary materials online, *Methods*).

### 2.7 Organ-bath study for vascular reactivity

We used 12-week-old male SHR that had received either a regular chow diet or  $\beta$ L in the diet (0.12% wt/wt) for 4 weeks. The animals were anaesthetized (50 mg/kg sodium pentobarbital, ip), and the adequacy and the depth of anaesthesia condition was monitored based on paw-pinch test. After then, the thoracic aorta was immediately excised and immersed in an ice-cold modified Krebs solution. The aorta was cleansed of all adherent connective tissue using wet filter paper soaked in Krebs bicarbonate solution, and cut into four ring segments (4 mm in length) as described in a previous study.<sup>29</sup> The rings were not denuded of endothelium, and two stainless steel triangles were inserted through each vessel ring. Each aortic ring was suspended in a water-jacketed organ bath (22 mL), maintained at  $37^\circ\text{C}$ , and aerated with a mixture of 95%  $\text{O}_2$ /5%  $\text{CO}_2$ . One triangle was anchored to a stationary support, and the other was connected to an isometric force transducer (Grass FT03C; Grass Instruments, Quincy, MA, USA). The rings were stretched passively by imposing the optimal resting tension, 2.0 g, which was then maintained throughout

the experiment. Each ring was equilibrated in an organ-bath solution for 90 min. The viability and endothelial integrity of the aortic ring were confirmed with the contractile response to  $10^{-6}$  mol/L phenylephrine and  $10^{-7}$  mol/L acetylcholine. Isometric contractions were recorded using a computerized data acquisition system (PowerLab/8SP; AD Instruments Pty. Ltd., Castle Hill, Australia). For the measurement of contractile response, aortic rings were pre-treated with  $10^{-6}$  mol/L phenylephrine and subjected to the cumulative addition of acetylcholine ( $10^{-9}$ – $10^{-5}$  mol/L). Endothelium-dependent vasodilation was determined by generating dose–response curves for acetylcholine. Vasorelaxation in response to acetylcholine was expressed as a percentage contraction, determined by the percentage of inhibition to the pre-constriction tension. Endothelium-dependent NOS-independent vasorelaxation was assessed by generating dose–response curves to acetylcholine in rings pre-treated with the NOS inhibitor L-NAME ( $10^{-4}$  mol/L). Endothelium-independent vasodilation was measured by vasorelaxation

in response to cumulative sodium nitroprusside in rings pre-constricted with phenylephrine ( $10^{-6}$  mol/L).

## 2.8 Measurement of eNOS activity

The conversion of [ $^{14}$ C]L-arginine to [ $^{14}$ C]L-citrulline was used to assess eNOS activity in cultured cells using the NOS activity assay kit (Cayman Chemicals, Inc., MI, USA) according to the manufacturer's instructions (see Supplementary materials online, *Methods*).

## 2.9 Measurement of $[Ca^{2+}]_i$

The  $[Ca^{2+}]_i$  in cells was measured with fluorescent dye fluo-4/AM (Invitrogen, Carlsbad, CA, USA) and confocal microscopy (LSM 510 META; Carl Zeiss, Jena, Germany) according to standard procedures (see Supplementary materials online, *Methods*).<sup>30</sup>

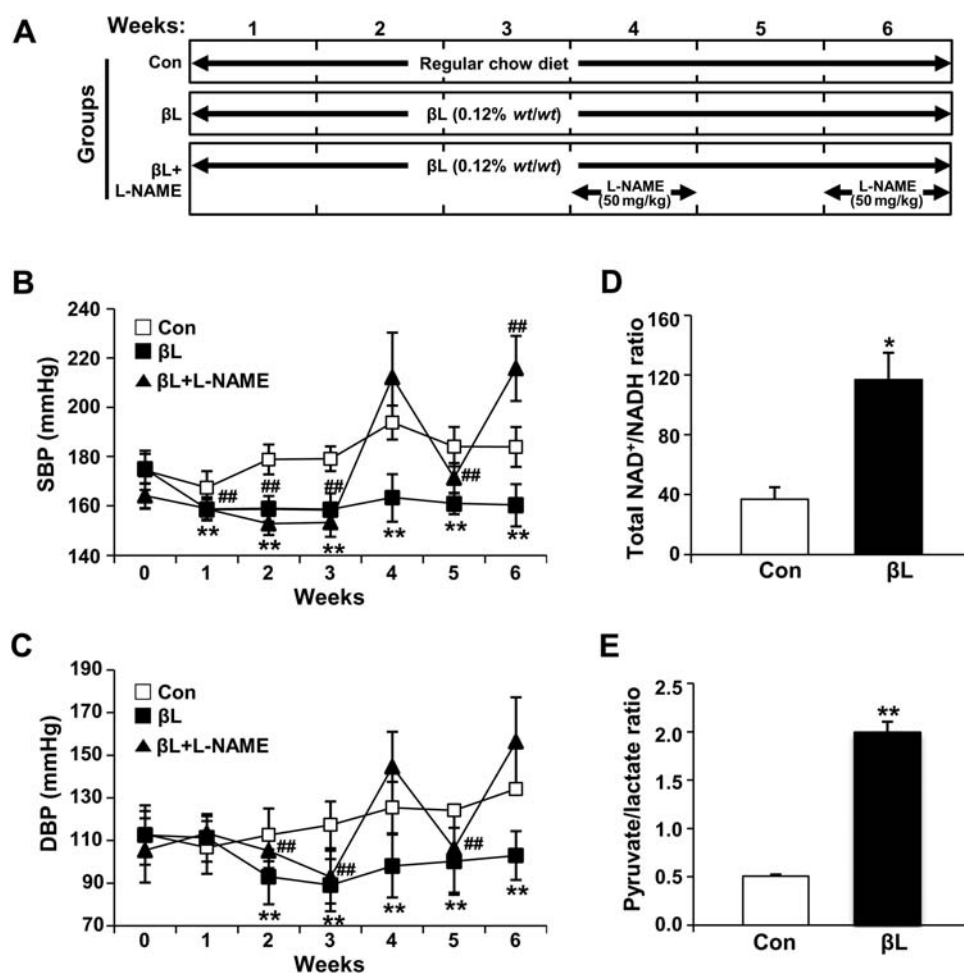

**Figure 1** βL reduces BP in SHR and induces NADH oxidation in endothelial cells. (A) Experimental schedule of βL and/or L-NAME treatment. L-NAME was added to drinking water for 7 days during Week 4 and 6 (50 mg/kg/day) in the βL + L-NAME group. (B and C) BP was measured six times using the tail cuff method. SBP and DBP measurements were analysed on the basis of the resting SBP. The SBP (B) and DBP (C) were evaluated using the mean value of six measurements under stable-heart rate conditions. Control group,  $n = 5$ ; βL group,  $n = 6$ ; βL + L-NAME group,  $n = 6$ ; grouped quantitative data are presented as means  $\pm$  SEM. ANOVA, \* $P < 0.05$ , \*\* $P < 0.01$ , βL group compared with control group; ### $P < 0.01$ , βL + L-NAME group compared with control group. The cellular NAD<sup>+</sup>/NADH ratio was analysed in bEnd.3 cells. (D) Cells were treated with  $10 \mu\text{mol/L}$  βL for 15 min. Treated cells were harvested with 80% methanol, and the supernatant was used for NAD<sup>+</sup> and NADH measurements. The NAD<sup>+</sup>/NADH ratio was calculated from levels of total NAD<sup>+</sup> and total NADH measured by high performance liquid chromatography/mass spectrometry/mass spectrometry analysis. (E) Cells were treated with  $10 \mu\text{mol/L}$  βL for 15 min. Treated cells were harvested with 1 mol/L perchloric acid. The supernatant was used for pyruvate and lactate measurements. Grouped quantitative data are presented as means  $\pm$  SEM from a minimum of three independent experiments. Student's *t*-test, \* $P < 0.05$ , and \*\* $P < 0.01$  compared with the control group.

## 2.10 Silencing of NQO1

At 30% confluence, bEnd.3 cells were transfected with HyperFect transfection reagent (Qiagen, Hilden, Germany) containing scrambled control siRNA (Invitrogen) or *Nqo1*-specific siRNA (AAACCAGCCUUU CAGAAUGGCUGGC; Invitrogen) following the manufacturer's instructions.

## 2.11 Adenoviral infection

Adenovirus encoding dnAMPK $\alpha$  was kindly provided by Dr In-Kyu Lee (Kyungpook National University School of Medicine),<sup>26</sup> and bEnd.3 cells were infected with adenoviral vectors.

## 2.12 Western blot analysis

Protein abundances and phosphorylation in isolated protein were analysed using western blot according to standard procedures (see Supplementary materials online, *Methods*).

## 2.13 Immunofluorescence staining

Paraffin sections were used for immunofluorescence staining. Following deparaffinizing and rehydration, the sections were treated with sodium citrate buffer (pH 6.5) and microwaved for 15 min. The sections were cooled for 30 min at room temperature and then incubated with 3% bovine serum albumin for 1 h. The tissue sections were incubated overnight at 4°C with anti-eNOS antibody (1:200). Alexa Fluoro 546 nm anti-mouse antibody (1:300) was then applied for 1 h at 37°C in the dark. Following each step, the samples were analysed under a dual fluorescence microscope (LSM 510 META; Carl Zeiss).

## 2.14 Statistical analyses

Numerical data are presented as means  $\pm$  SEM. Comparisons between groups were performed using a two-tailed Student's *t*-test or one-way ANOVA test for multiple comparisons. The threshold of significance was set at  $P < 0.05$ .

## 3. Results

### 3.1 $\beta$ L reduces BP in SHR and increases the NAD<sup>+</sup>/NADH ratio in endothelial cells

As a result of  $\beta$ L supplementation in SHR, SBP and DBP were significantly reduced in both  $\beta$ L (159  $\pm$  3 mmHg) and  $\beta$ L + L-NAME (154  $\pm$  3 mmHg) groups (Figure 1B and C) when compared with the control (179  $\pm$  3 mmHg) at 3 weeks post-treatment. However, following an additional week of L-NAME treatment, the BP-lowering effect of  $\beta$ L in the  $\beta$ L + L-NAME group was blocked, and the SBP rebounded to a level beyond that of the control group (212  $\pm$  8 mmHg). The rebound-elevated BP in the  $\beta$ L + L-NAME group was reversed by the cessation of L-NAME administration for 1 week. These results were reproduced with a second treatment of L-NAME to the same group. In contrast, the lowered SBP level was maintained in the  $\beta$ L group (Figure 1B and C). These studies strongly support the model that  $\beta$ L decreases BP in a hypertensive animal model in an endothelium-dependent manner. Accordingly, we have used bEnd.3 cells to investigate whether  $\beta$ L increases the cellular NAD<sup>+</sup>/NADH ratio via NQO1 activation in endothelial cells. The total cellular NAD<sup>+</sup>/NADH ratio in mouse bEnd.3 cells was significantly increased by  $\beta$ L treatment (Figure 1D). The pyruvate/lactate ratio representing the cytosolic free NAD<sup>+</sup>/NADH ratio<sup>28</sup> was also significantly increased by  $\beta$ L treatment (Figure 1E).

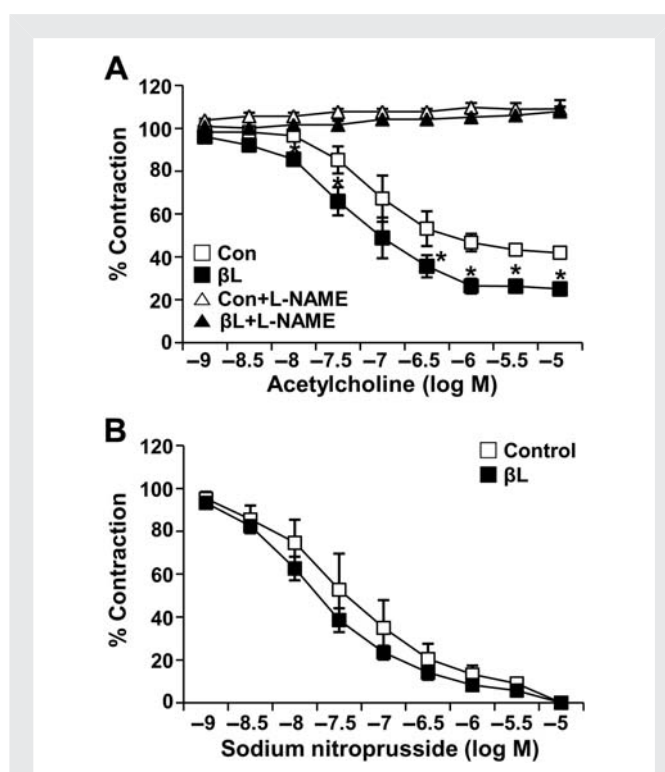

**Figure 2**  $\beta$ L regulates endothelium-dependent vasodilation through eNOS. SHR received either a normal chow diet or a  $\beta$ L-supplemented diet (0.12% wt/wt) for 4 weeks. The thoracic aortas were extracted for the aortic ring test. (A) Endothelium-dependent vasodilation in response to acetylcholine (ACh), in the presence and absence of the NOS inhibitor L-NAME, was determined by measuring the relaxation of rings that had been pre-constricted with phenylephrine. (B) Endothelium-independent vasodilation was determined by measuring the relaxation of rings pre-constricted with phenylephrine in response to the NO donor sodium nitroprusside.  $n = 3$  rings for each group; grouped quantitative data are presented as means  $\pm$  SEM. Student's *t*-test, \* $P < 0.05$  compared with the control group.

### 3.2 $\beta$ L improves vasomotor function in SHR

An *ex vivo* organ-bath study was performed to measure the effect of  $\beta$ L on aortic tension in SHR treated with  $\beta$ L for 4 weeks. Acetylcholine-induced (endothelium-dependent) vasorelaxation was improved in rings from  $\beta$ L-treated SHR (Figure 2A). In contrast, endothelium-independent vasodilation induced by the NO donor sodium nitroprusside was comparable between rings from control and  $\beta$ L-treated SHR (Figure 2B). Similarly, acetylcholine-induced vasodilation was absent in both control and  $\beta$ L-treated rings treated with L-NAME (Figure 2A).  $\beta$ L treatment, therefore, is believed to promote endothelium-dependent vasodilation and vascular bioavailability of NO through an eNOS-dependent mechanism.

### 3.3 $\beta$ L stimulates eNOS activity through serine phosphorylation

Next, we used HAEC and bEnd.3 cells to investigate whether  $\beta$ L induces phosphorylation of eNOS at Ser<sup>1177</sup>, a catalytically active phosphorylation site. As shown in Figure 3A, B, C, and D,  $\beta$ L stimulated eNOS-Ser<sup>1177</sup> phosphorylation in a concentration- and time-

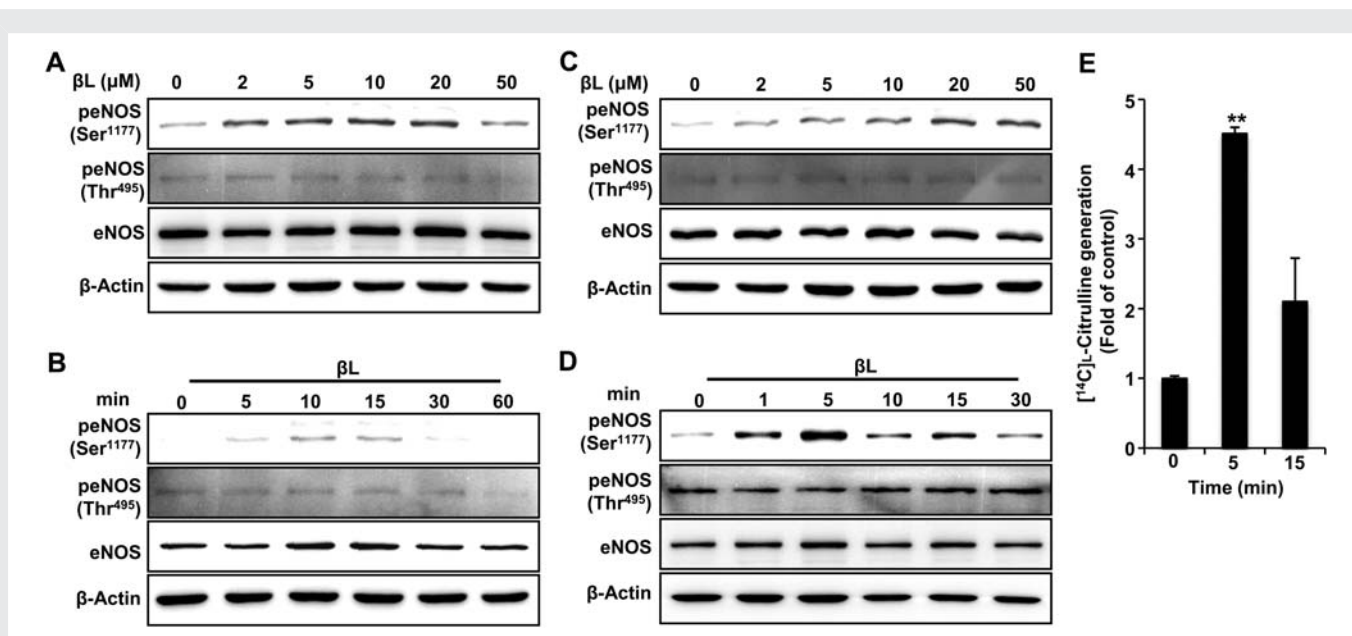

**Figure 3**  $\beta$ L increases eNOS activity via Ser1177 phosphorylation. (A and C) HAEC (A) and bEnd.3 cells (C) were stimulated with the indicated concentrations of  $\beta$ L for (A) 15 or (C) 5 min, and eNOS phosphorylation was determined using immunoblot analysis using a phospho-specific antibody. (B and D) Representative western blots showing time-dependent changes in eNOS in HAEC (B) and bEnd.3 cells (D) stimulated with 20  $\mu$ mol/L  $\beta$ L. (E) bEnd.3 cells were treated with 10  $\mu$ mol/L of  $\beta$ L for 5 and 15 min, and eNOS activity was assayed by [ $^{14}$ C]-citulline production from [ $^{14}$ C]-arginine. Results were normalized for total protein. Data for the control group are shown as 1 and average fold changes are displayed. Representative data from three independent experiments are shown.

dependent manner. However, eNOS-Thr<sup>495</sup> phosphorylation (an inactive phosphorylation site) was not altered by  $\beta$ L treatment in both HAEC (Figure 3A and B) and bEnd.3 cells (Figure 3C and D). To investigate more directly whether  $\beta$ L can increase eNOS enzyme activity, the production of [ $^{14}$ C]-citulline was measured in bEnd.3 cells treated with  $\beta$ L. Within 5 min of  $\beta$ L treatment, [ $^{14}$ C]-citulline production was significantly increased (Figure 3E). On the basis of these results, we suggest that  $\beta$ L promotes eNOS activity by regulating Ser<sup>1177</sup> phosphorylation.

### 3.4 $\beta$ L-induced eNOS activation is dependent on PI3K/Akt and AMPK pathways

Ser<sup>1177</sup> phosphorylation and subsequent eNOS activation in response to several distinct eNOS activators is mediated by PI3K/Akt or AMPK activation.<sup>11–13</sup> Therefore, we investigated whether  $\beta$ L activates Akt or AMPK, and whether the activation precedes eNOS-Ser<sup>1177</sup> phosphorylation *in vitro*. Phosphorylation of both Akt and AMPK was detected within 5 min (HAEC) or 1 min (bEnd.3 cells) of  $\beta$ L treatment. This is consistent with either, or both, signalling pathways being involved in eNOS activation (Figure 4A and B). To identify the kinase involved in eNOS-Ser<sup>1177</sup> phosphorylation, bEnd.3 cells were treated with inhibitors of PI3K (LY249002) and AMPK (compound C) prior to  $\beta$ L treatment. Figure 4C shows that compound C had no effect on  $\beta$ L-induced eNOS phosphorylation. However, LY249002 dramatically inhibited the effect of  $\beta$ L on eNOS phosphorylation. These data indicate that  $\beta$ L-induced eNOS-Ser<sup>1177</sup> phosphorylation is mediated through Akt signalling but not by AMPK.

To further explore our hypothesis that the AMPK pathway is not required for  $\beta$ L-induced eNOS phosphorylation, we used a dominant-

negative AMPK (Ad-dnAMPK $\alpha$ ) expressing adenovirus to inhibit AMPK in bEnd.3 cells. Figure 4D shows that AMPK activation by AICAR did not increase eNOS phosphorylation in bEnd.3 cells. Interestingly, in cells overexpressing Ad-dnAMPK $\alpha$ ,  $\beta$ L seemed to diminish eNOS phosphorylation. This was due to decreased eNOS protein levels resulting from AMPK $\alpha$  inhibition, an observation consistent with a previous study.<sup>13</sup> Moreover, inhibition of endogenous AMPK by Ad-dnAMPK $\alpha$  transfection resulted in a time-dependent decrease in eNOS protein levels followed by a dnAMPK $\alpha$  increase (Figure 4E). These studies demonstrate that AMPK is also involved in  $\beta$ L-stimulated eNOS activation in endothelial cells through regulation of eNOS protein expression.

### 3.5 $\beta$ L-stimulated phosphorylation of eNOS/Akt/AMPK is mediated by a NQO1-dependent increase in intracellular calcium

To investigate whether the  $\beta$ L-induced increase in the cellular NAD<sup>+</sup>/NADH ratio (Figure 1D and E) can regulate [Ca<sup>2+</sup>]<sub>i</sub> in endothelial cells, intracellular calcium fluxes were estimated using a Fluo-4/AM-based assay.  $\beta$ L led to increased [Ca<sup>2+</sup>]<sub>i</sub> within 0.5 min. This [Ca<sup>2+</sup>]<sub>i</sub> level was maintained until 1 min and then gradually decreased to basal levels by 2 min. The increased [Ca<sup>2+</sup>]<sub>i</sub> resulting from  $\beta$ L treatment was completely abolished by blockade of [Ca<sup>2+</sup>]<sub>i</sub> release with BABTA-AM. [Ca<sup>2+</sup>]<sub>i</sub> release was partially suppressed by extracellular calcium chelation with EGTA (Figure 5A). The effect of  $\beta$ L on [Ca<sup>2+</sup>]<sub>i</sub> was also suppressed using a RyR antagonist (8-Br-cADPR) and NQO1 inhibitors (dicoumarol and ES936) (Figure 5A and B). We next identified the molecular mechanisms underlying  $\beta$ L-induced intracellular calcium flux in endothelial cells.

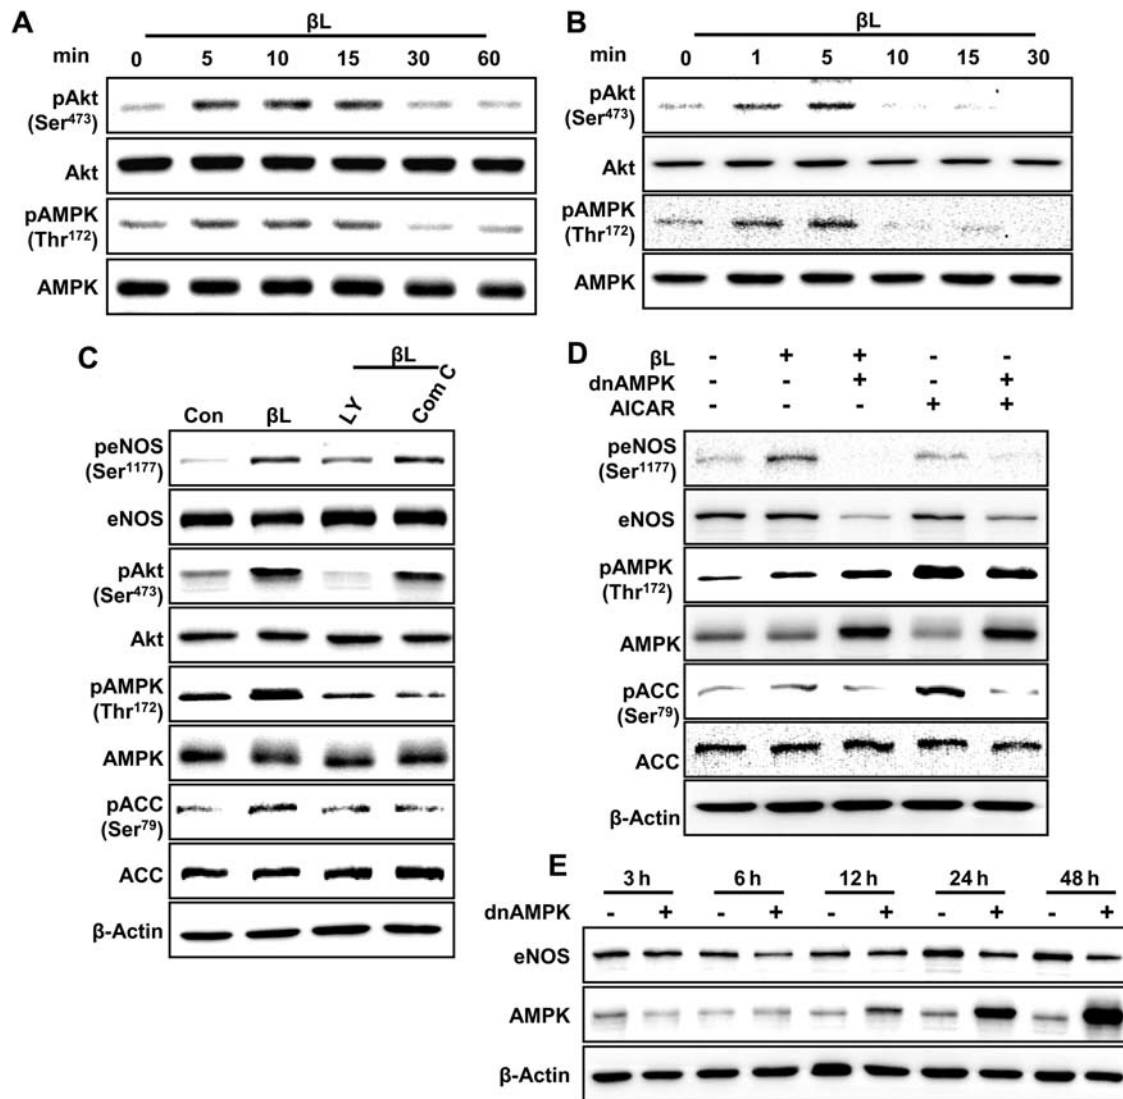

**Figure 4** Phosphorylation of Akt and AMPK-mediated eNOS activation by βL. (A and B) HAEC (A) and bEnd.3 cells (B) were stimulated with 20 μmol/L of βL for the indicated time points, and active phosphorylation of Akt and AMPK was determined using immunoblot analysis using a phospho-specific antibody. (C) bEnd.3 cells were pre-treated with LY294002 (LY; 25 μmol/L) or compound C (Com C; 20 μmol/L) for 45 min, and treated with 20 μmol/L of βL for 5 min. Immunoblot analyses were performed using indicated antibodies. (D) bEnd.3 cells were infected with adenovirus encoding dnAMPKα for 60 h followed by stimulation with βL (20 μmol/L for 5 min) or AICAR (500 μmol/L for 1 h). (E) bEnd.3 cells were infected with adenovirus encoding dnAMPKα for the indicated times, and eNOS expression was determined by western blot. Representative blots from three independent experiments are shown.

Pre-treatment with BABTA-AM completely abolished βL-stimulated eNOS/Akt/AMPK phosphorylation. EGTA also partially inhibited phosphorylation of eNOS and Akt by βL (Figure 5C). RyR blockade with ADP-ribosyl cyclase inhibitor (nicotinamide) and 8-Br-cADPR also inhibited eNOS/Akt/AMPK phosphorylation by βL (Figure 5D). βL-induced phosphorylation of eNOS, Akt, and AMPK were all decreased by NQO1 inhibition, achieved by *Nqo1* siRNA transfection or ES936 treatment (Figure 5E). Intriguingly, pre-treatment with KN-93, a specific inhibitor of calcium/calmodulin-dependent protein kinase II (CaMKII), resulted in complete blockage of eNOS and Akt phosphorylation by βL (Figure 5F). These data strongly suggest that βL-induced increases in [Ca<sup>2+</sup>]<sub>i</sub> occur prior to eNOS activation resulting from Akt and AMPK phosphorylation in endothelial cells.

### 3.6 βL treatment increases aortic eNOS activity in SHR

We sought to confirm the aforementioned bEnd.3 *in vitro* data with an *in vivo* study of aortic eNOS activation in βL-treated SHR. eNOS and Akt phosphorylation increased after 3 days and 4 weeks of βL treatment. However, Akt phosphorylation then decreased within 6 weeks of βL treatment, corresponding with a reduction in eNOS phosphorylation (Figure 6A). Total eNOS protein levels were dramatically increased at all measured time points following βL treatment in SHR aorta. This was associated with increased AMPK phosphorylation (Figure 6A). The βL-induced increase in eNOS expression in the aorta was confirmed histologically. Intense

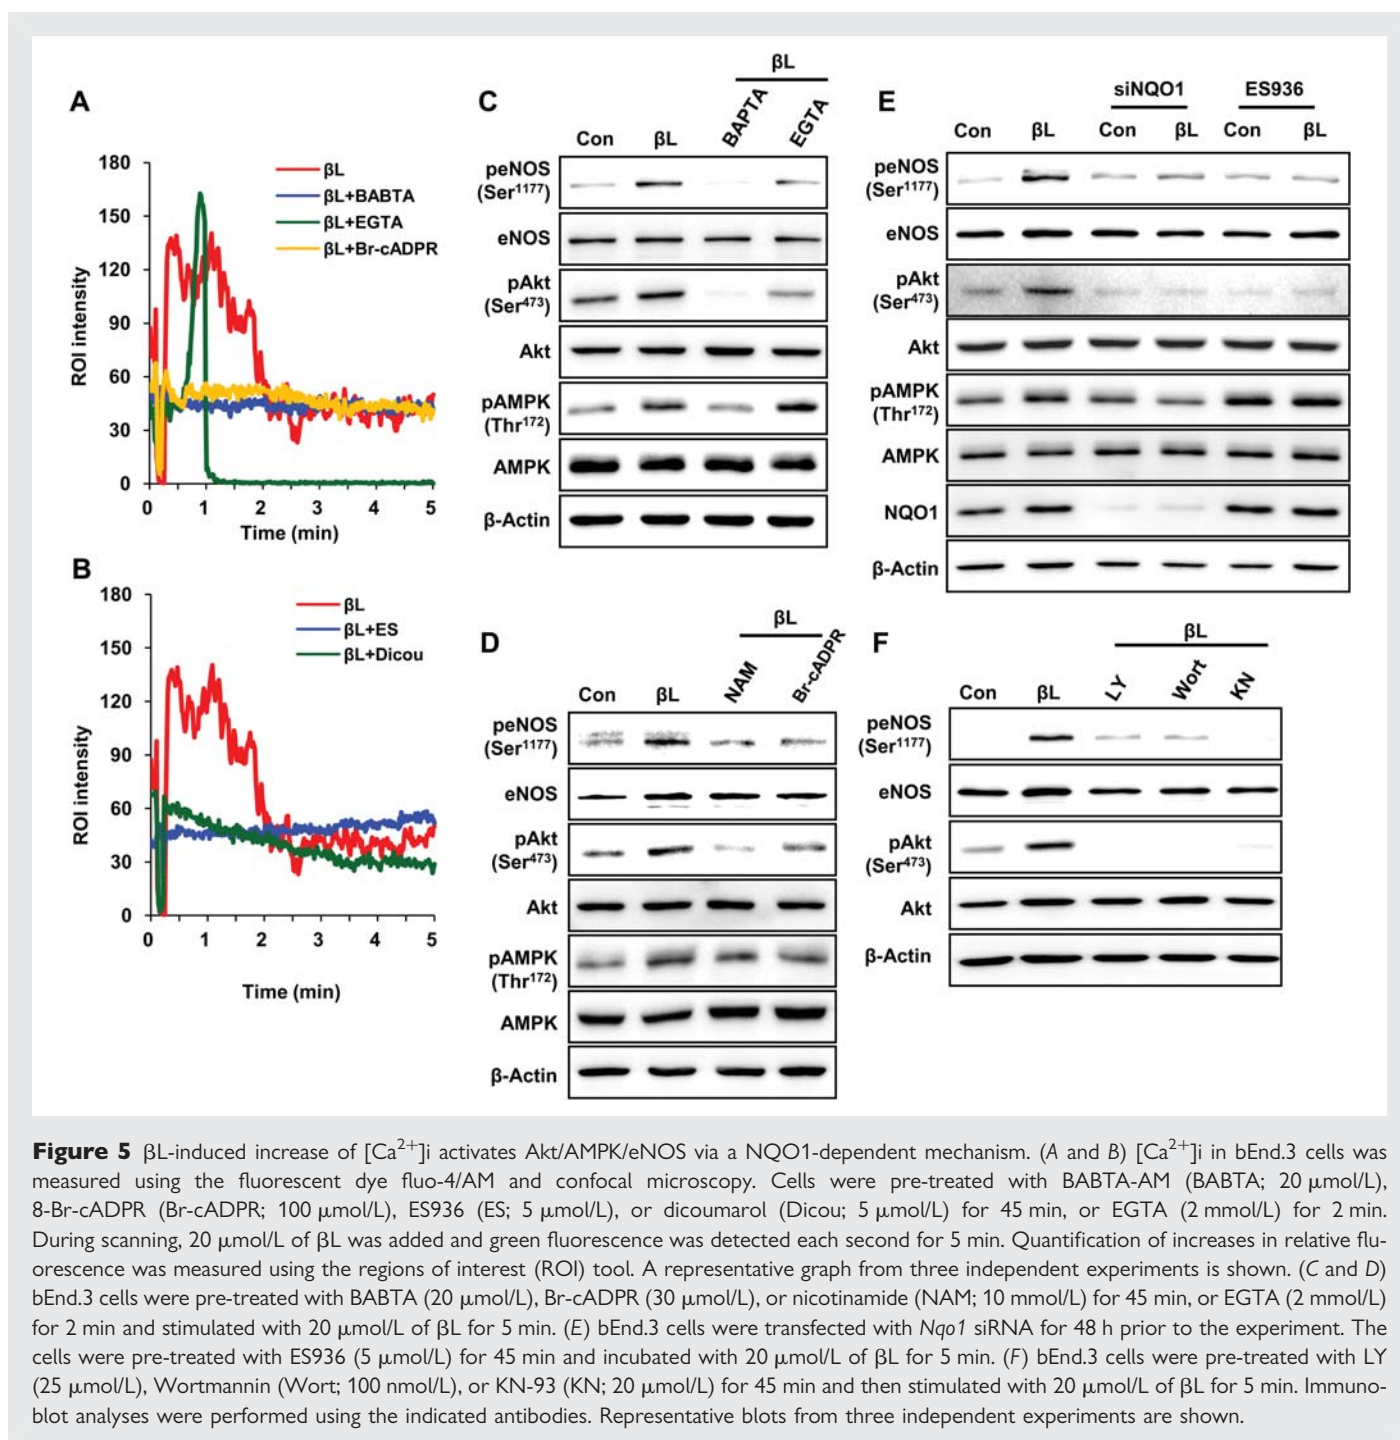

eNOS staining localized to the aortic endothelium was observed after 6 weeks of  $\beta$ L treatment (Figure 6B). These data indicate that eNOS phosphorylation and protein expression are all stimulated by  $\beta$ L treatment, resulting in increased eNOS activity in the aorta and reduced SHR BP.

## 4. Discussion

In this study, we found that  $\beta$ L treatment increased cytoplasmic  $NAD^+/NADH$  ratio through NQO1 activation resulting in reduced BP and vascular tension in SHR. These effects were completely

blocked by eNOS inhibition with L-NAME (Figures 1 and 2). This data strongly suggested that the hypotensive effect of  $\beta$ L resulted from endothelial eNOS activity modulation. As we were interested in endothelial cell eNOS modulation by  $\beta$ L, we measured cellular  $NAD^+/NADH$  ratio in endothelial cells. As expected,  $\beta$ L treatment significantly increased total  $NAD^+/NADH$  ratio (Figure 1D) and the cytoplasmic pyruvate/lactate ratio indicating free  $NAD^+/NADH$  ratio<sup>28</sup> (Figure 1E) in endothelial cells, and these results were considered a consequence of  $\beta$ L-induced NQO1 activation. Additionally, eNOS phosphorylation was also relatively decreased in 6 weeks  $\beta$ L-treated SHR, which have showed reduced BP (Figure 6A). From these results, it was assumed that  $\beta$ L-induced increase in cellular

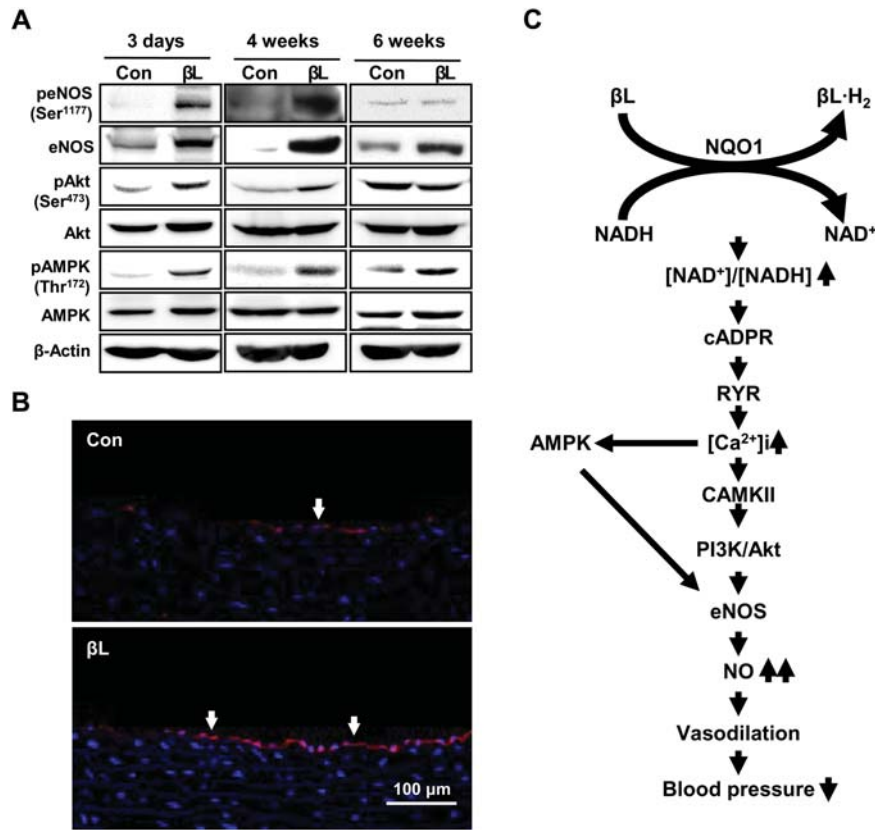

**Figure 6** βL activates eNOS in the aorta of SHR. The SHR were divided into three groups containing three to six animals. 0.12% βL (wt/wt) was added to the regular chow diet for 3 days, 4 weeks, and 6 weeks. The SHR aortas were excised and pooled. (A) Western blot analyses were performed using indicated antibodies for total aortic protein according to the manufacturer's protocol. Representative blots from three independent experiments are shown. (B) The aortas of SHR treated with βL for 6 weeks were excised. Aortic eNOS protein was detected using an anti-eNOS antibody and visualized with red fluorescence. The arrow indicates the aortic endothelium. Pictures are shown at  $\times 200$  magnification with a confocal microscope. Control group,  $n = 3-5$ ; βL group,  $n = 3-6$ . (C) Model for the BP regulation mechanism of βL.

NAD<sup>+</sup>/NADH ratio ameliorated hypertension through vascular tone control via eNOS modulation under hypertensive stress conditions. In current study, meanwhile, eNOS is a downstream protein of NQO1, and L-NAME is a specific inhibitor of eNOS. Because we thought that L-NAME might not affect the cellular NAD<sup>+</sup>/NADH ratio regulated by NQO1, βL, and L-NAME co-treated group was excluded in cellular NAD<sup>+</sup>/NADH ratio analysis *in vitro*.

In general, vascular endothelial cells are ubiquitous, multifunctional, and play a crucial role in regulating BP through the control of vascular tone and homeostasis.<sup>6,31</sup> BP is mediated by changes in the generation and release of the vasodilator NO. This occurs in response to various stimuli. eNOS-Ser<sup>1177</sup> phosphorylation through the PI3K-dependent Akt and maintenance of eNOS protein expression by AMPK are indispensable for eNOS activation.<sup>11-13</sup> In the present study, βL was shown to activate eNOS-Ser<sup>1177</sup> phosphorylation along with the active phosphorylation of Akt (Figures 3, 4, and 6). The AMPK inhibitor compound C did not block this phenomenon. However, LY249002 and Wortmannin (PI3K inhibitors) inhibited this eNOS phosphorylation (Figures 4C and 5F). Furthermore, βL increased eNOS protein levels through AMPK phosphorylation in all measured time points in βL-treated SHR aortic tissues (Figure 6). The eNOS protein levels were decreased by AMPK inhibition with dnAMPK $\alpha$  in bEnd.3 cells (Figure 4D and E). Based on these results,

it is assumed that the hypotensive effect of βL is due to the synergic effect of AMPK on eNOS protein expression and PI3K/Akt on eNOS phosphorylation.

Next, we explored the upstream mediator of eNOS phosphorylation following βL-activation of NQO1 in bEnd.3 cells. A large number of endothelial functions including, notably, eNOS activity, depend on [Ca<sup>2+</sup>]<sub>i</sub> changes<sup>15</sup> to varying extents. cADPR generated from NAD<sup>+</sup> by ADP-ribosyl cyclase was reported to participate in intracellular Ca<sup>2+</sup> oscillations in a RyRs-dependent manner in endothelial cells.<sup>16,32,33</sup> In the present study, intracellular calcium fluxes were increased by endothelial cell βL treatment. This βL-stimulated increase in [Ca<sup>2+</sup>]<sub>i</sub> was completely inhibited by the intracellular calcium chelator (BABTA-AM) and the RyRs antagonist (8-Br-cADPR), but not by the extracellular calcium chelator (EGTA) (Figure 5A). Moreover, inhibition of [Ca<sup>2+</sup>]<sub>i</sub> was observed following NQO1 inhibitor (dicoumarol and ES936) treatment (Figure 5B). In parallel with the inhibition of [Ca<sup>2+</sup>]<sub>i</sub>, βL-induced active phosphorylation of PI3K/Akt-eNOS and AMPK was inhibited (Figure 5C, D, and E). These results indicate that the elevated cytoplasmic NAD<sup>+</sup>/NADH ratio resulting from βL-induced NQO1 activation can increase [Ca<sup>2+</sup>]<sub>i</sub> via RyR-mediated Ca<sup>2+</sup> release. Moreover, the βL-induced elevation of [Ca<sup>2+</sup>]<sub>i</sub> promotes eNOS activity through PI3K/Akt and AMPK phosphorylation. Resveratrol was previously



reported to increase cytosolic  $\text{Ca}^{2+}$  levels and activate AMPK by the calcium/calmodulin-dependent protein kinase kinase- $\beta$  (CaMKK $\beta$ ).<sup>34</sup> PI3K is positively regulated by  $\text{Ca}^{2+}$  via CaMKII.<sup>35</sup> Our results show that increased PI3K/Akt-eNOS phosphorylation by  $\beta\text{L}$  was completely abolished by CaMKII inhibition in this study (Figure 5F). Taken together with previous studies,<sup>34,35</sup> our results provide strong evidence suggesting that  $\beta\text{L}$ -induced phosphorylation of PI3K/Akt and AMPK is mediated by  $\text{Ca}^{2+}$ -induced activation of CaMKII or CaMKK $\beta$ .

In conclusion, this is the first study demonstrating that NQO1 activation by  $\beta\text{L}$  leads to decreased BP in a hypertensive animal model. As summarized in Figure 6C, the hypotensive effect of  $\beta\text{L}$  is attributable to NO-mediated vascular relaxation via aortic eNOS activation. This is mediated by active phosphorylation of PI3K/Akt and AMPK through  $[\text{Ca}^{2+}]_i$  elevation, which is mediated by modulation of cytoplasmic  $\text{NAD}^+/\text{NADH}$  ratio via NQO1 activation. Previous studies reported that calorie restriction and exercise have beneficial effects on BP in hypertensive patients during clinical trials.<sup>36,37</sup> In addition, calorie restriction and exercise were reported to lead to an increase in  $\text{NAD}^+/\text{NADH}$  ratio.<sup>38–40</sup> Therefore, modulation of cellular  $\text{NAD}^+/\text{NADH}$  ratio might be a new therapeutic approach for hypertension.

## Supplementary material

Supplementary material is available at *Cardiovascular Research* online.

## Acknowledgments

The authors thank Dong-Hee Choi for technical assistance.

**Conflict of interest:** none declared.

## Funding

This work was supported by a research grant (M10753020007) from The National Research Foundation of Korea, and by the KRIBB Research Initiative Program of Korea.

## References

- Chobanian AV, Bakris GL, Black HR, Cushman WC, Green LA, Izzo JL Jr et al. Seventh report of the Joint National Committee on Prevention, Detection, Evaluation, and Treatment of High Blood Pressure. *Hypertension* 2003;**42**:1206–1252.
- Khanna A, Lefkowitz L, White WB. Evaluation of recent fixed-dose combination therapies in the management of hypertension. *Curr Opin Nephrol Hypertens* 2008;**17**:477–483.
- Brown MJ. Hypertension and ethnic group. *BMJ* 2006;**332**:833–836.
- Moser M, Franklin SS. Hypertension management: results of a new national survey for the hypertension education foundation: Harris interactive. *J Clin Hypertens (Greenwich)* 2007;**9**:316–323.
- Furchgott RF, Zawadzki JV. The obligatory role of endothelial cells in the relaxation of arterial smooth muscle by acetylcholine. *Nature* 1980;**288**:373–376.
- Ignarro LJ, Buga GM, Wood KS, Byrns RE, Chaudhuri G. Endothelium-derived relaxing factor produced and released from artery and vein is nitric oxide. *Proc Natl Acad Sci USA* 1987;**84**:9265–9269.
- Rees DD, Palmer RM, Moncada S. Role of endothelium-derived nitric oxide in the regulation of blood pressure. *Proc Natl Acad Sci USA* 1989;**86**:3375–3378.
- Fleming I, Bauersachs J, Busse R. Calcium-dependent and calcium-independent activation of the endothelial NO synthase. *J Vasc Res* 1997;**34**:165–174.
- Andrew PJ, Mayer B. Enzymatic function of nitric oxide synthases. *Cardiovasc Res* 1999;**43**:521–531.
- Bredt DS, Snyder SH. Isolation of nitric oxide synthetase, a calmodulin-requiring enzyme. *Proc Natl Acad Sci USA* 1990;**87**:682–685.
- Dimmeler S, Fleming I, Fisslthaler B, Hermann C, Busse R, Zeiher AM. Activation of nitric oxide synthase in endothelial cells by Akt-dependent phosphorylation. *Nature* 1999;**399**:601–605.
- Harris MB, Ju H, Venema VJ, Liang H, Zou R, Michell BJ et al. Reciprocal phosphorylation and regulation of endothelial nitric-oxide synthase in response to bradykinin stimulation. *J Biol Chem* 2001;**276**:16587–16591.
- Colombo SL, Moncada S. AMPK $\alpha$ 1 regulates the antioxidant status of vascular endothelial cells. *Biochem J* 2009;**421**:163–169.

- Tran QK, Ohashi K, Watanabe H. Calcium signalling in endothelial cells. *Cardiovasc Res* 2000;**48**:13–22.
- Busse R, Mülsch A. Calcium-dependent nitric oxide synthesis in endothelial cytosol is mediated by calmodulin. *FEBS Lett* 1990;**265**:133–136.
- De Flora A, Zocchi E, Guida L, Franco L, Bruzzone S. Autocrine and paracrine calcium signaling by the CD38/NAD<sup>+</sup>/cyclic ADP-ribose system. *Ann N Y Acad Sci* 2004;**1028**:176–191.
- Brouet A, Sonveaux P, Dessy C, Balligand JL, Feron O. Hsp90 ensures the transition from the early  $\text{Ca}^{2+}$ -dependent to the late phosphorylation-dependent activation of the endothelial nitric-oxide synthase in vascular endothelial growth factor-exposed endothelial cells. *J Biol Chem* 2001;**276**:32663–32669.
- Motley ED, Eguchi K, Patterson MM, Palmer PD, Suzuki H, Eguchi S. Mechanism of endothelial nitric oxide synthase phosphorylation and activation by thrombin. *Hypertension* 2007;**49**:577–583.
- Ross D, Kepa JK, Winski SL, Beall HD, Anwar A, Siegel D. NAD(P)H:quinone oxidoreductase 1 (NQO1): chemoprotection, bioactivation, gene regulation and genetic polymorphisms. *Chem Biol Interact* 2000;**129**:77–97.
- Gaikwad A, Long DJ 2nd, Stringer JL, Jaiswal AK. In vivo role of NAD(P)H:quinone oxidoreductase 1 (NQO1) in the regulation of intracellular redox state and accumulation of abdominal adipose tissue. *J Biol Chem* 2001;**276**:22559–22564.
- Nioi P, Hayes JD. Contribution of NAD(P)H:quinone oxidoreductase 1 to protection against carcinogenesis, and regulation of its gene by the Nrf2 basic-region leucine zipper and the arylhydrocarbon receptor basic helix-loop-helix transcription factors. *Mutat Res* 2004;**555**:149–171.
- Pardee AB, Li YZ, Li CJ. Cancer therapy with beta-lapachone. *Curr Cancer Drug Targets* 2002;**2**:227–242.
- Pinto AV, de Castro SL. The trypanocidal activity of naphthoquinones: a review. *Molecules* 2009;**14**:4570–4590.
- Planchon SM, Wuerzberger S, Frydman B, Witak DT, Hutson P, Church DR et al. Beta-lapachone-mediated apoptosis in human promyelocytic leukemia (HL-60) and human prostate cancer cells: a p53-independent response. *Cancer Res* 1995;**55**:3706–3711.
- Hwang JH, Kim DW, Jo EJ, Kim YK, Jo YS, Park JH et al. Pharmacological stimulation of NADH oxidation ameliorates obesity and related phenotypes in mice. *Diabetes* 2009;**58**:965–974.
- Kim SY, Jeoung NH, Oh CJ, Choi YK, Lee HJ, Kim HJ et al. Activation of NAD(P)H:quinone oxidoreductase 1 prevents arterial restenosis by suppressing vascular smooth muscle cell proliferation. *Circ Res* 2009;**104**:842–850.
- Lazzarino G, Amorini AM, Fazzina G, Vagnozzi R, Signoretti S, Donzelli S et al. Single-sample preparation for simultaneous cellular redox and energy state determination. *Anal Biochem* 2003;**322**:51–59.
- Williamson DH, Lund P, Krebs HA. The redox state of free nicotinamide-adenine dinucleotide in the cytoplasm and mitochondria of rat liver. *Biochem J* 1967;**103**:514–527.
- Seok Y, Kim JI, Ito M, Kureishi Y, Nakano T, Kim SO et al. Heat shock-induced augmentation of vascular contractility is independent of rho-kinase. *Clin Exp Pharmacol Physiol* 2006;**33**:264–268.
- Wagner S, Maasch C, Lindschau C, Alexander G, Buchner K, Gollasch M et al. Protein kinase alpha targeting is regulated by temporal and spatial changes in intracellular free calcium concentration  $[\text{Ca}^{2+}]_i$ . *FASEB J* 2000;**14**:1653–1663.
- Ignarro LJ. Nitric oxide as a unique signaling molecule in the vascular system: a historical overview. *J Physiol Pharmacol* 2002;**53**:503–514.
- Lesh RE, Marks AR, Somlyo AV, Fleischer S, Somlyo AP. Anti-ryanodine receptor antibody binding sites in vascular and endocardial endothelium. *Circ Res* 1993;**72**:481–488.
- Laskey RE, Adams DJ, Cannell M, van Breemen C. Calcium entry-dependent oscillations of cytoplasmic calcium concentration in cultured endothelial cell monolayers. *Proc Natl Acad Sci USA* 1992;**89**:1690–1694.
- Vingtdeux V, Giliberto L, Zhao H, Chandakkar P, Wu Q, Simon JE et al. AMP-activated protein kinase signaling activation by resveratrol modulates amyloid-beta peptide metabolism. *J Biol Chem* 2010;**285**:9100–9113.
- Ma W, Mishra S, Gee K, Mishra JP, Nandan D, Reiner NE et al. Cyclosporin A and FK506 inhibit IL-12p40 production through the calmodulin/calmodulin-dependent protein kinase-activated phosphoinositide 3-kinase in lipopolysaccharide-stimulated human monocytes. *J Biol Chem* 2007;**282**:13351–13362.
- Appel LJ, Champagne CM, Harsha DW, Cooper LS, Obarzanek E, Elmer PJ et al. Effects of comprehensive lifestyle modification on blood pressure control: main results of the PREMIER clinical trial. *JAMA* 2003;**289**:2083–2093.
- Lefevre M, Redman LM, Heilbronn LK, Smith JV, Martin CK, Rood JC et al. Caloric restriction alone and with exercise improves CVD risk in healthy non-obese individuals. *Atherosclerosis* 2009;**203**:206–213.
- Guarente L. Mitochondria—a nexus for aging, calorie restriction, and sirtuins?. *Cell* 2008;**132**:171–176.
- Chen D, Bruno J, Easlson E, Lin SJ, Cheng HL, Alt FW et al. Tissue-specific regulation of SIRT1 by calorie restriction. *Genes Dev* 2008;**22**:1753–1757.
- Cantó C, Gerhart-Hines Z, Feige JN, Lagouge M, Noriega L, Milne JC et al. AMPK regulates energy expenditure by modulating  $\text{NAD}^+$  metabolism and SIRT1 activity. *Nature* 2009;**458**:1056–1060.
